# Supplementary material
Source: Springer Nature journal article supplement (https://www.springermedizin.de/resource/supplementary/12913_2013_3024_MOESM2_ESM.pdf/9533348)

### Fentanyl

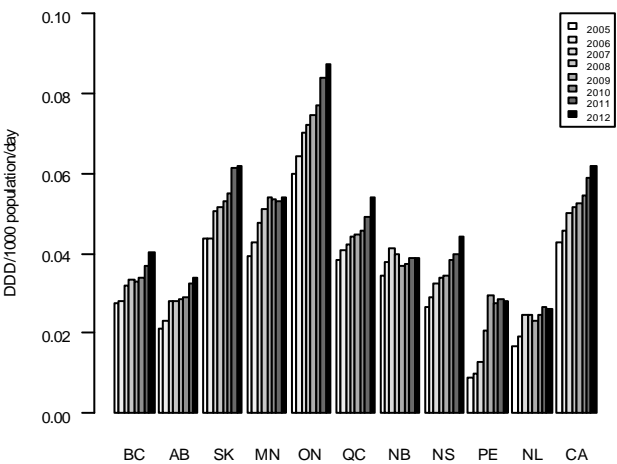

### Hydrocodone

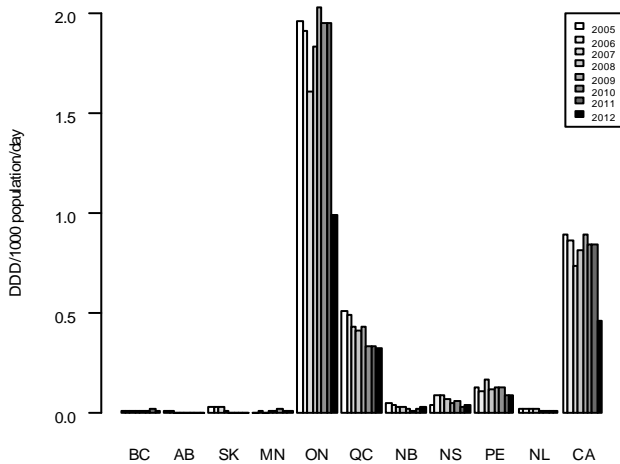

### Hydromorphone

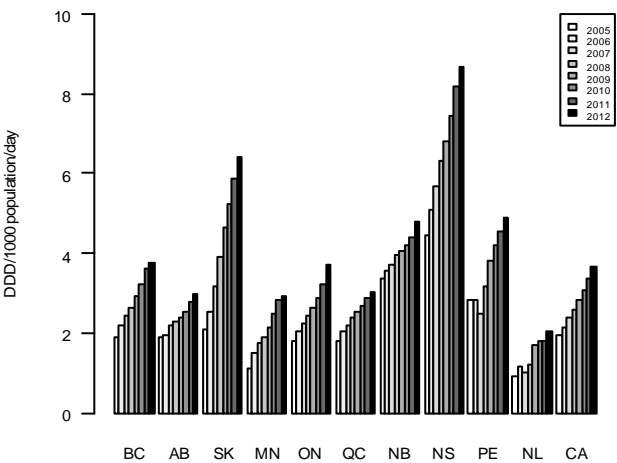

### Meperidine

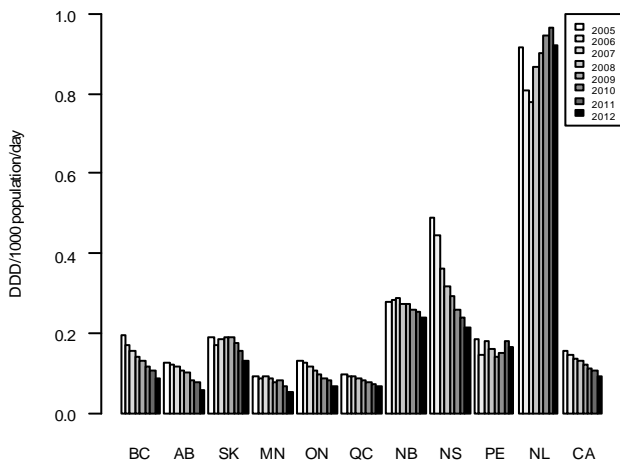

### Morphine

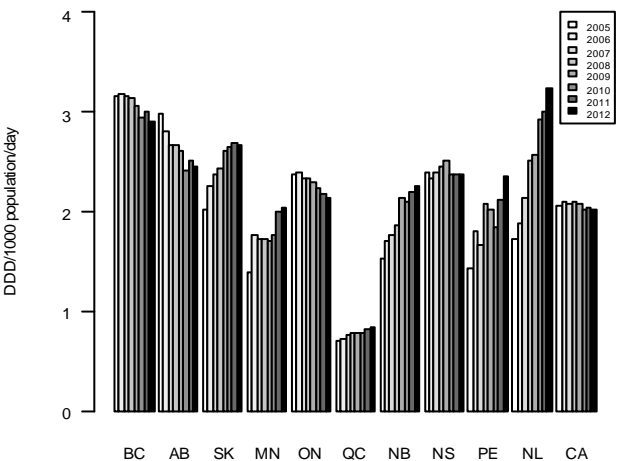

### Oxycodone

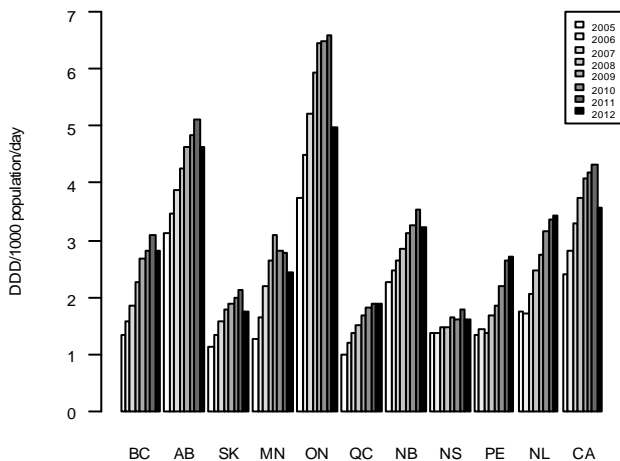

Supplement: MOESM2 [file 9533348]
